# Supplementary material for: Porous coordination polymers based on functionalized Schiff base linkers: enhanced CO2uptake by pore surface modification
Source: Royal Society of Chemistry journal article supplement (doi:10.1039/c3dt52266k), 2013-10-24
Supplement: c3dt52266k.pdf [file c3dt52266k.pdf]

### Electronic Supporting Informations

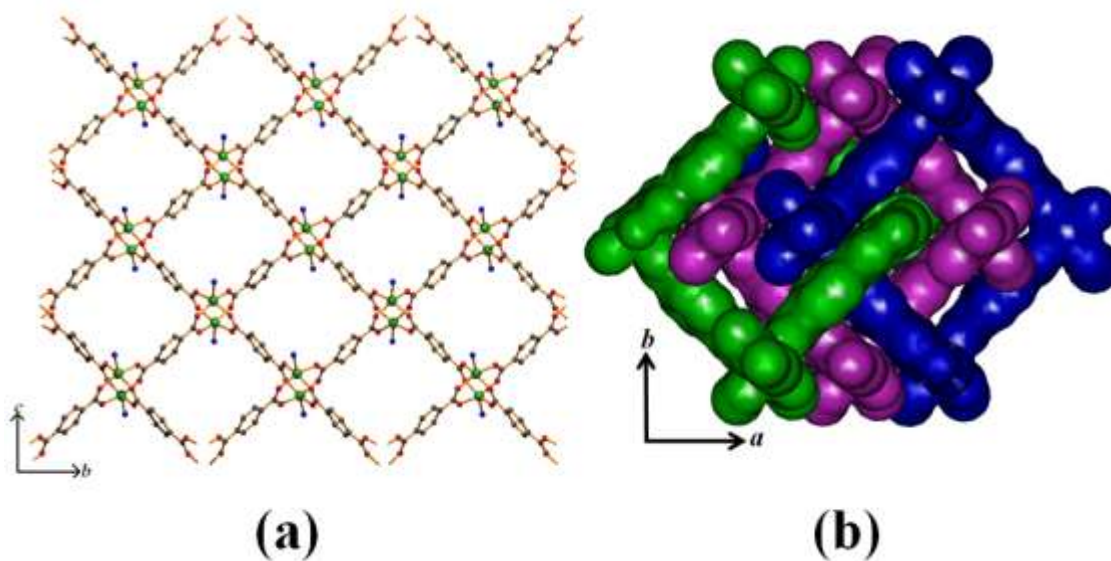

**Fig. S1** (a) 2D brick-wall arrangement in **4** constructed by metal-terephthalate paddle-wheel moiety (*Meazpy* has been omitted for clarity); (b) View of the threefold interpenetrated of the 3D networks.

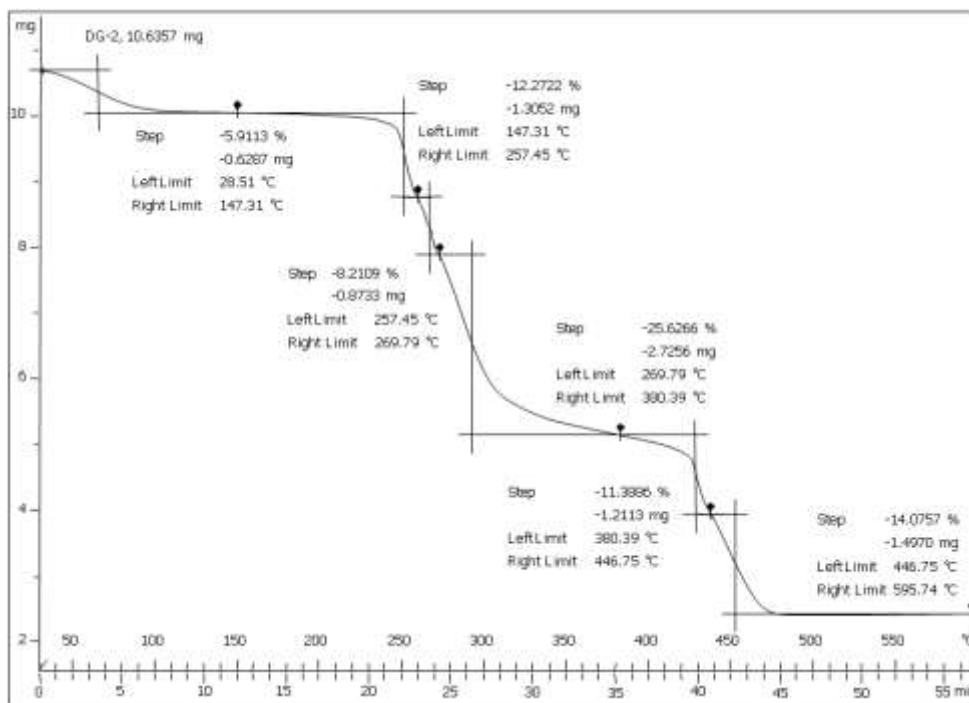

**Fig. S2** TGA of the compound **2** under N<sub>2</sub> atmosphere.

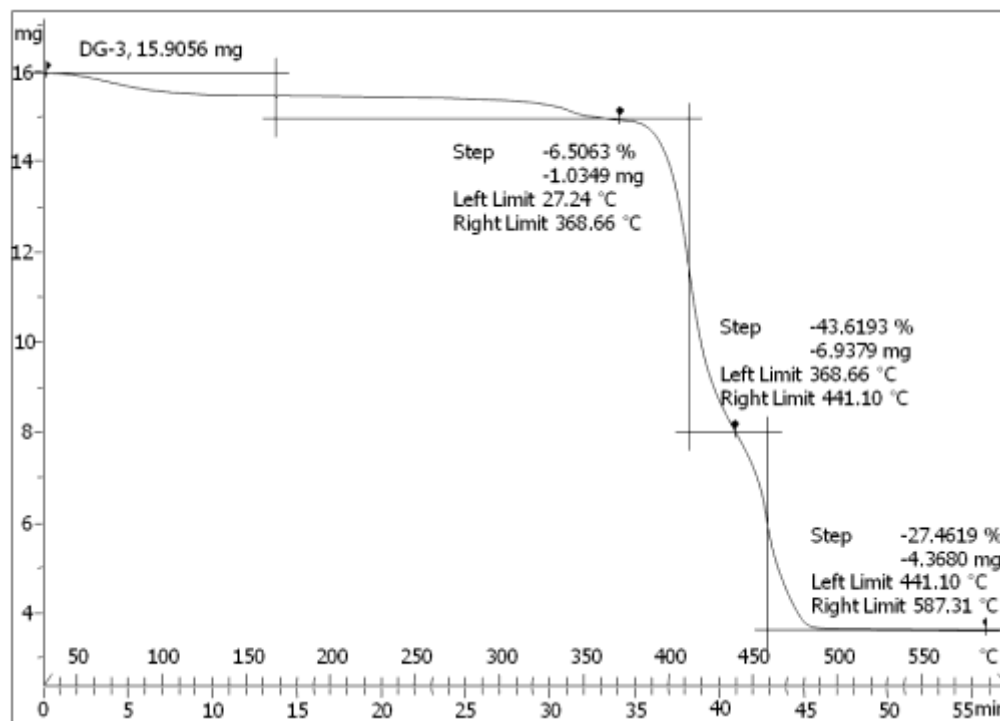

**Fig. S3** TGA of the compound 3 under N<sub>2</sub> atmosphere

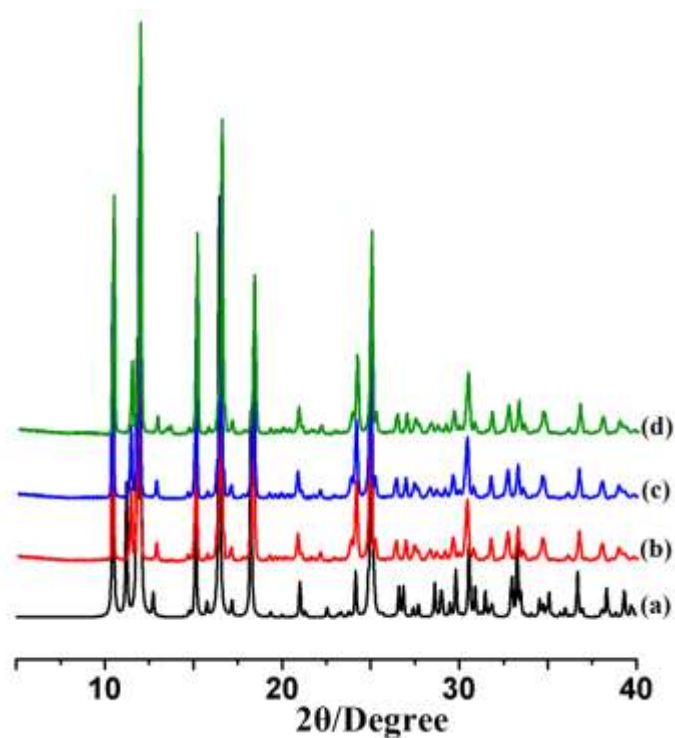

**Fig. S4** PXRD patterns of **3** in different states. (a) Simulated from X-ray single crystal data; (b) bulk as-synthesized compound; (c) at 150 °C; (d) exposed to the water vapour for seven days.

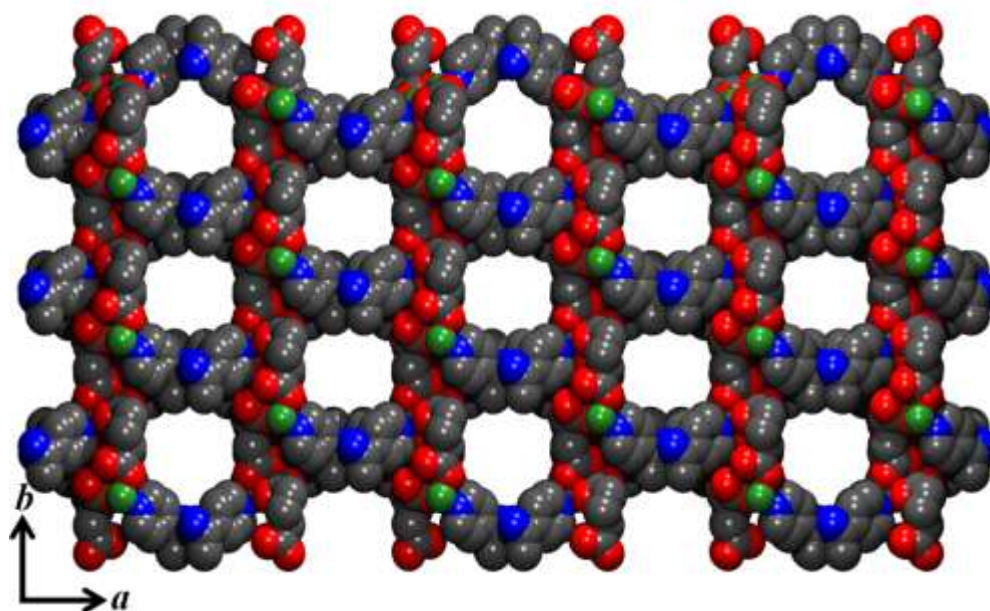

**Fig. S5** The space filling model of the dehydrated species of **2** showing the 3D honeycomb-like empty channel along *c*-axis.

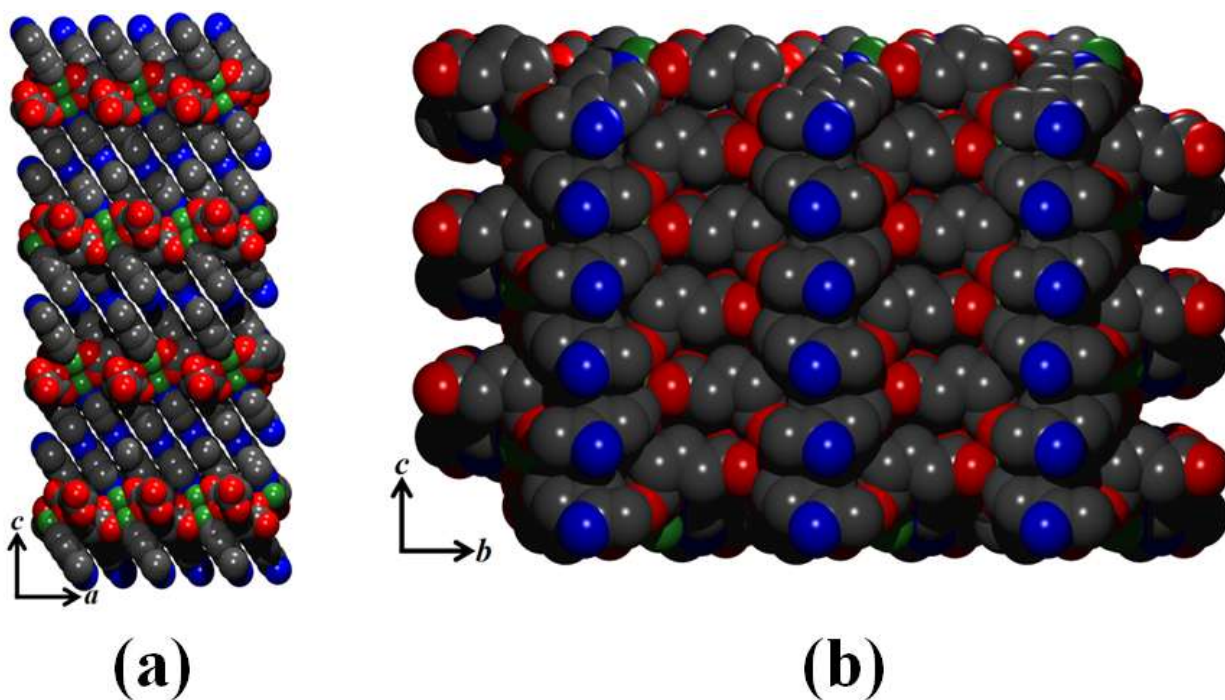

**Fig. S6** The space filling model of the dehydrated species of **2** viewed along *b*-axis and *a*-axis.

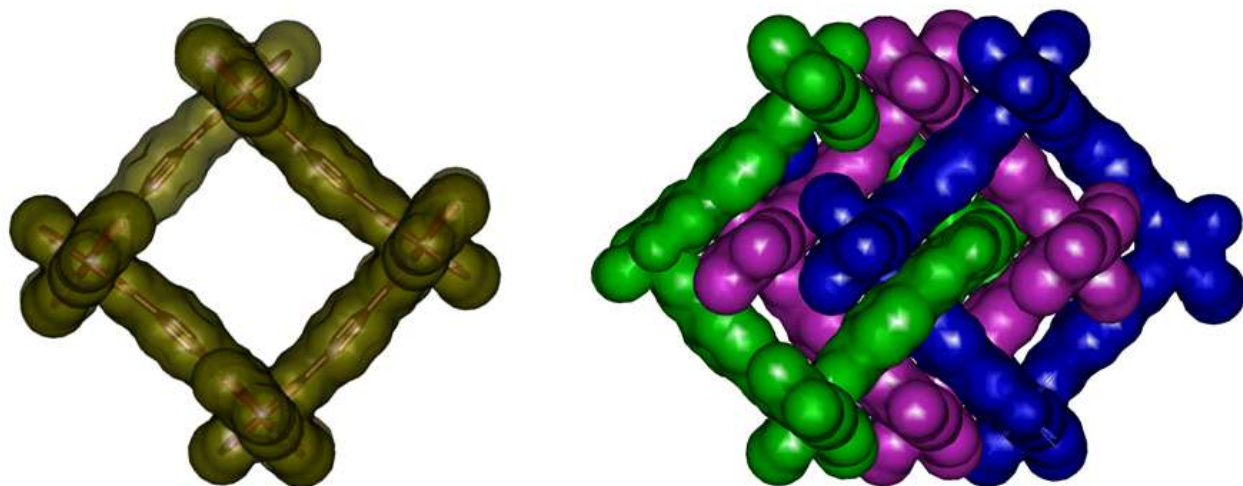

Fig. S7 Blockage of pore due to three-fold interpenetration in **3** and **4**.

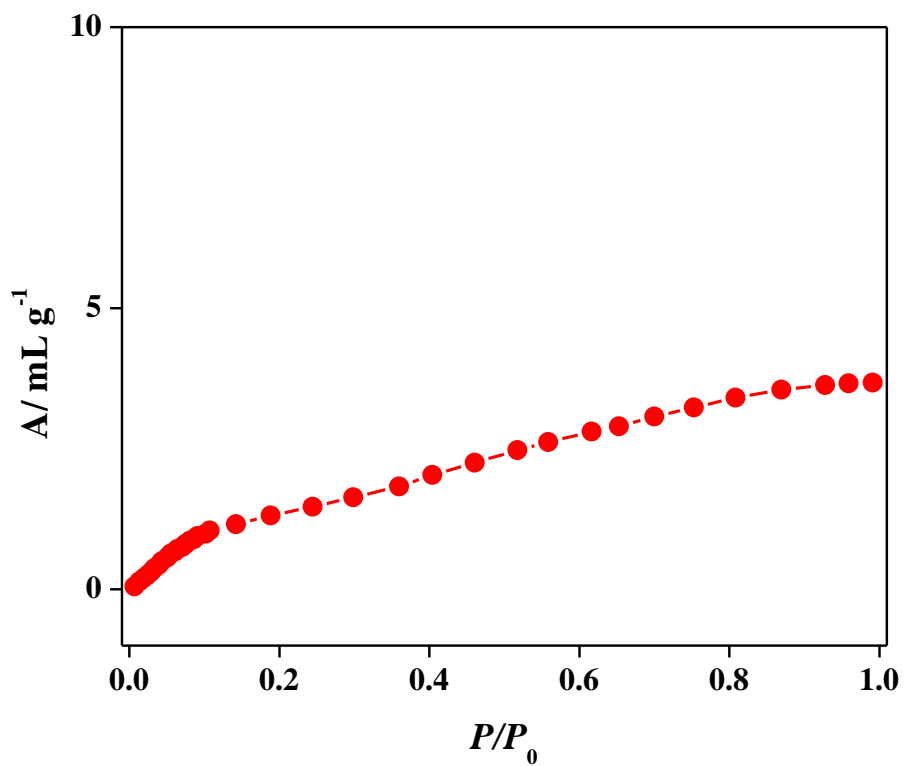

Fig. S8  $\text{H}_2$  adsorption isotherms of **3** below 1.0 bar pressure at 77 K.

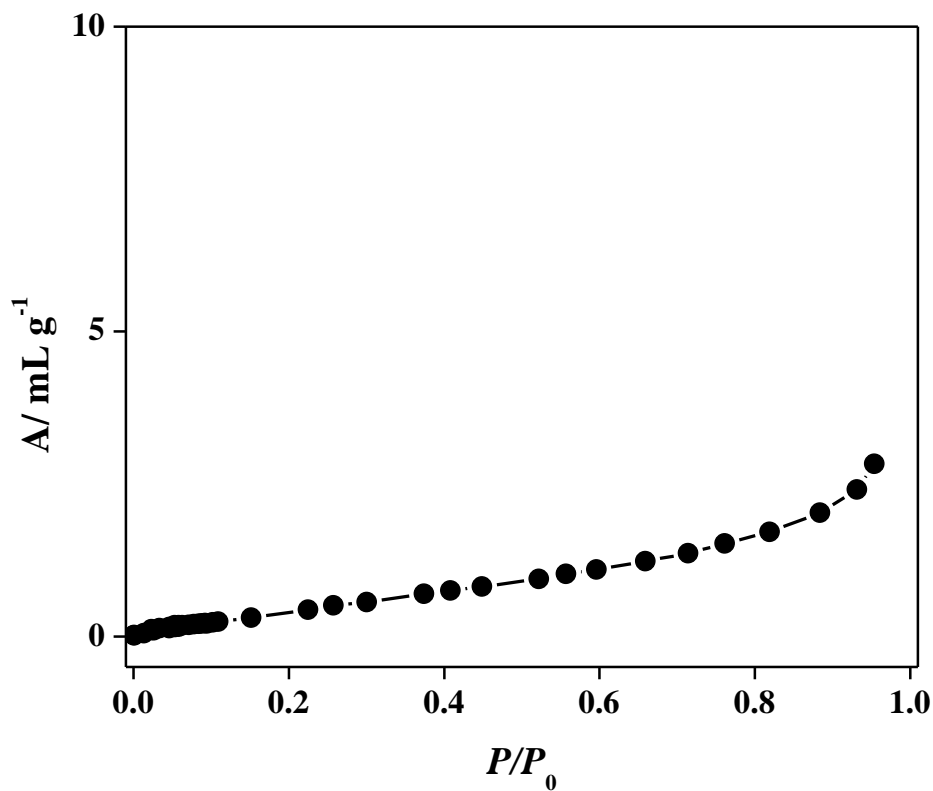

Fig. S9 N<sub>2</sub> adsorption isotherms of **3** below 1.0 bar pressure at 77 K.

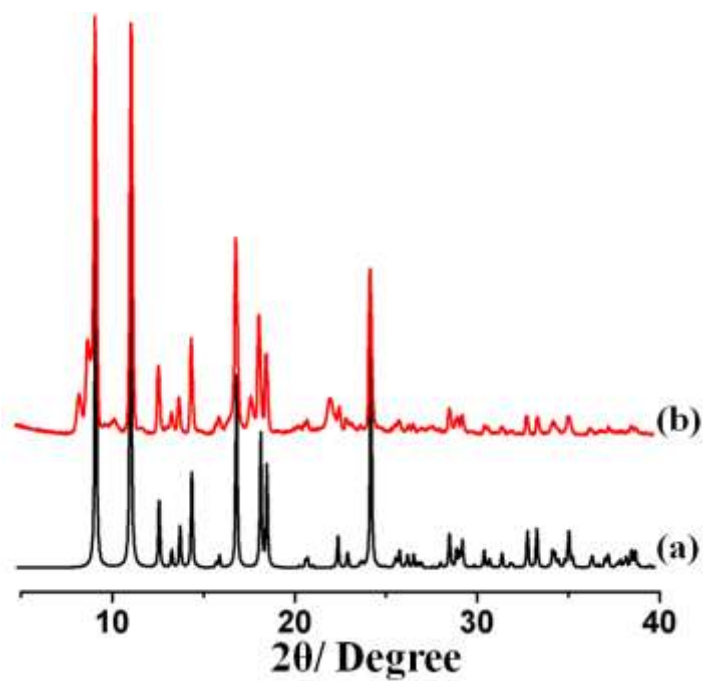

Fig. S10 PXRD patterns of **4** in different states (a) Simulated from X-ray single crystal data; (b) bulk as-synthesized compound.



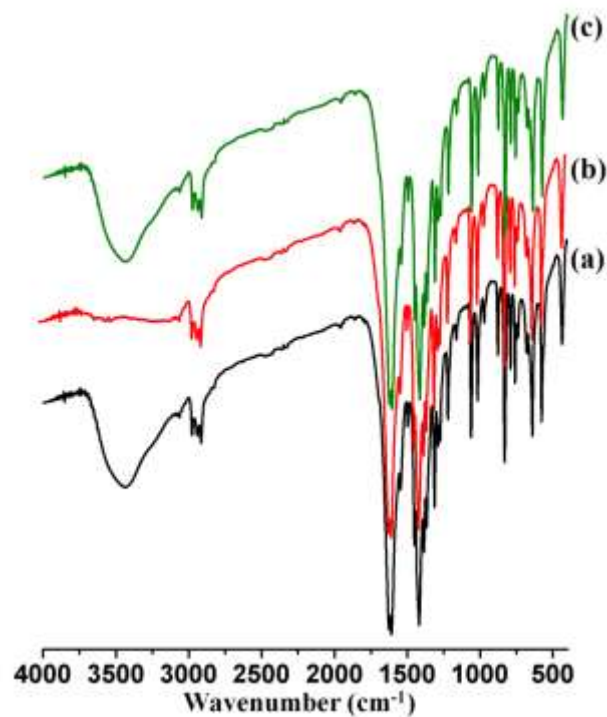

**Fig. S11** FT-IR spectra of **2** in different states. (a) As-synthesized; (b) Dehydrated; (c) Rehydrated.

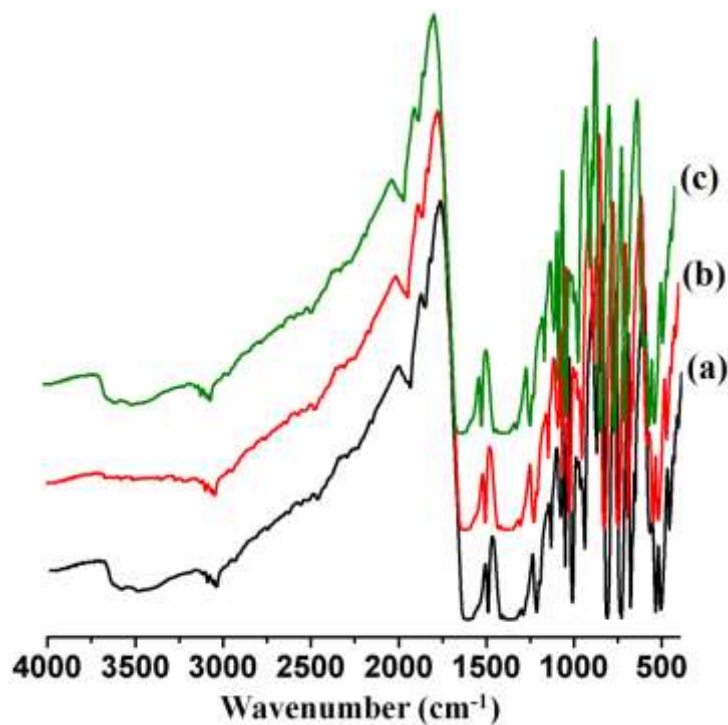

**Fig. S12** FT-IR spectra of **3** in different states. (a) As-synthesized; (b) Dehydrated; (c) Rehydrated.

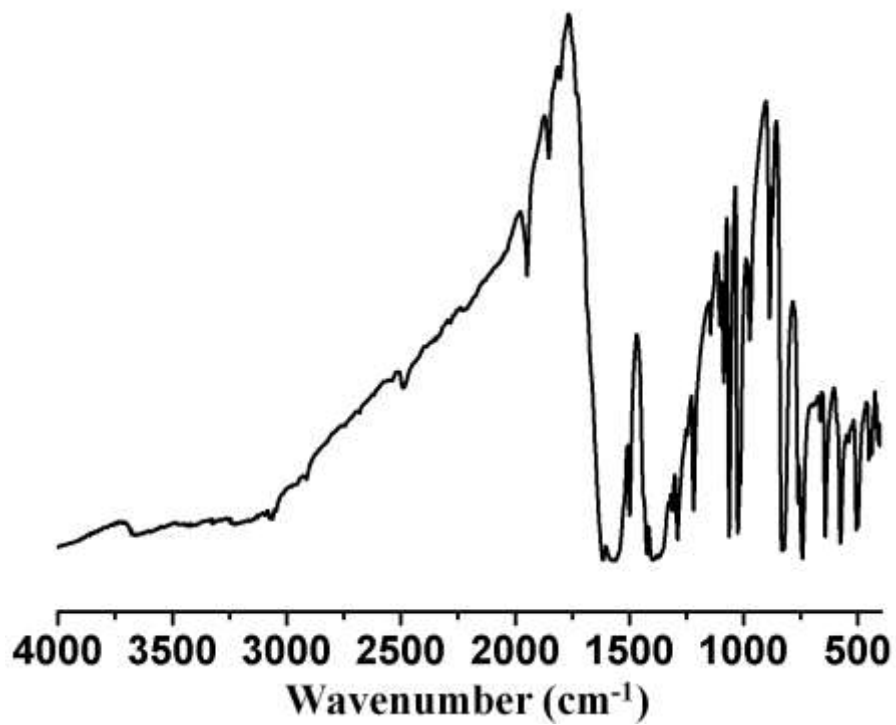

**Fig. S13** FT-IR spectra of compound 4.
